# Supplementary material for: The anti-inflammatory agent bindarit acts as a modulator of fatty acid-binding protein 4 in human monocytic cells
Source: PubMed Central journal article supplement (PMC6805920; doi:10.1038/s41598-019-51691-y), 2019-10-22

## Supplementary Information

### **The anti-inflammatory agent bindarit acts as a modulator of fatty acid-binding protein 4 in human monocytic cells**

*Sergio Oddi<sup>a,b,\*</sup>, Lucia Scipioni<sup>b</sup>, Antonio Totaro<sup>b</sup>, Clotilde Angelucci<sup>a</sup>, Beatrice Dufrusine<sup>a</sup>, Annalaura Sabatucci<sup>a</sup>, Daniel Tortolani<sup>a</sup>, Isabella Coletta<sup>c</sup>, Maria Alessandra Alisi<sup>c</sup>, Lorenzo Polenzani<sup>c</sup>, Michael Assfalg<sup>d</sup>, Carlo Caltagirone<sup>b</sup>, Enrico Dainese<sup>a#</sup> and Mauro Maccarrone<sup>b,e#,\*</sup>*

Contents: Concentration-response curve of bindarit; full length blots of Figure 2 and Figure 6

### Supplementary Figure 1

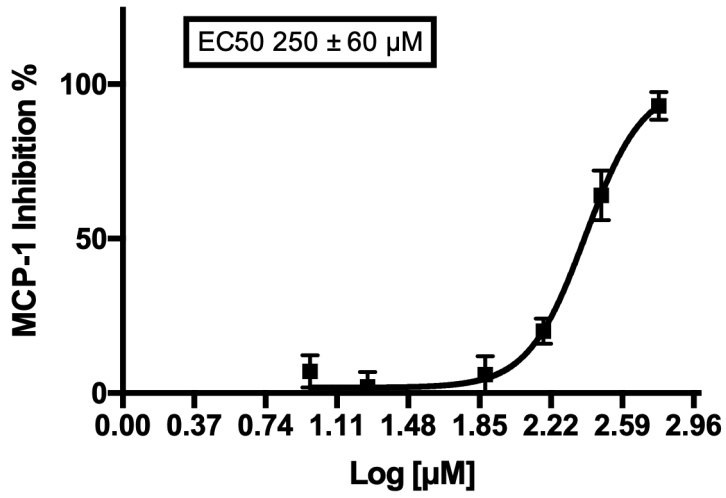

**Supplementary Figure 1.** Concentration-response curve of bindarit. Results are expressed as percent of inhibition and represent mean  $\pm$  S.D. of 2 experiments.

# Original blots for Figure 1

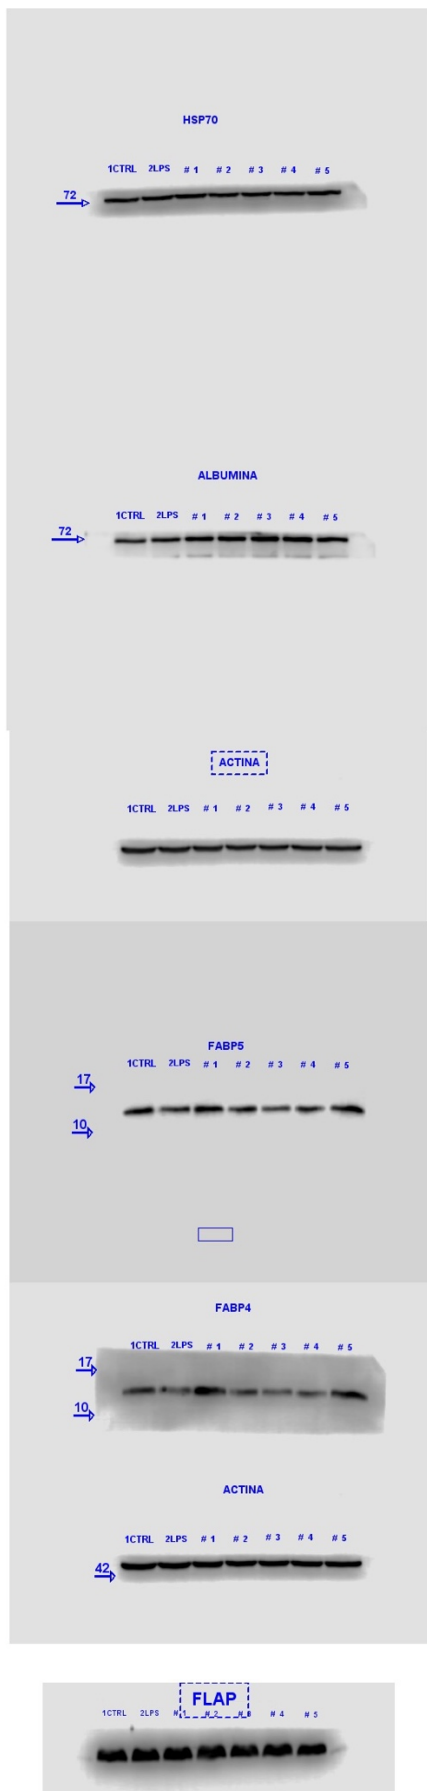

# Original blots for Figure 4 for the immunodetection of FABP4 in MM-6 cells.

Lanes

1:CTRL

2: LPS

3: Compound #1: bindarit

Exp#31

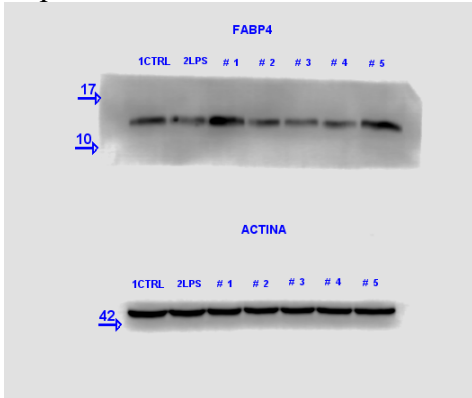

Exp#34

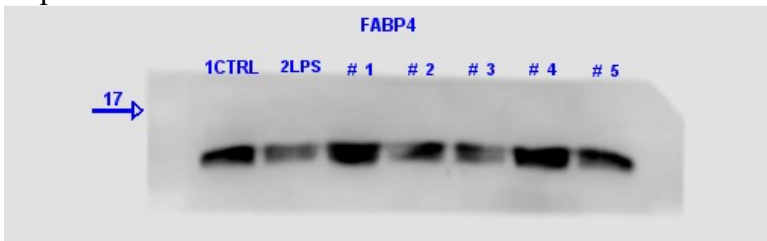

Exp#38

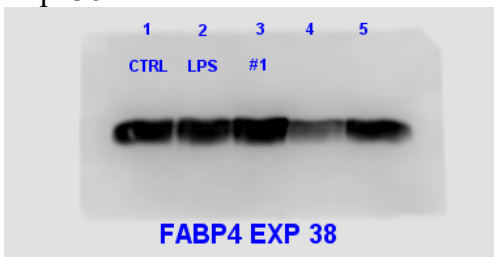

Exp#39

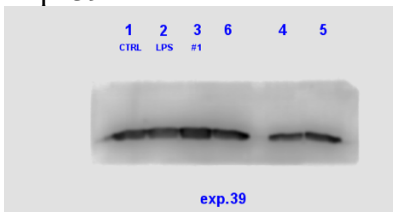

Exp#54

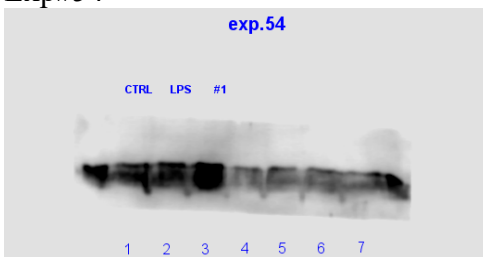

Supplement: 41598_2019_51691_MOESM1_ESM.pdf [file 41598_2019_51691_MOESM1_ESM.pdf]
